# Supplementary material
Source: publisher figshare collection journal article supplement (https://gsajournals.figshare.com/ndownloader/files/28547964)
Supplement: Supplementary file 1 [file 28547964]

#CC032PhenotypeAnalysis.R

library(dplyr)
library(ggplot2)
library(data.table)
library(RColorBrewer)
library(ggrepel)

colors = c("deepskyblue2", brewer.pal(n = 8, name = "Dark2")[4])
founder.strains = c("129S1/SvImJ", "A/J", "C57BL/6J", "CAST/EiJ", "NOD/ShiLtJ", "NZO/HlLtJ", "PWK/PhJ", "WSB/EiJ")
setwd("~/Box/iMac/Documents/Projects/SexRatioBias/Manuscript/SupplementalData/")


###########################################################################
#load in the data
###########################################################################
phenos = fread("TableS13_cc_repro_phenotypes.csv")

female.biased.strains = phenos$Strain[which(phenos$sig == 2)]
male.biased.strains = phenos$Strain[which(phenos$sig == 1)]


###########################################################################
#compare histology phenotypes in CC032 to founders 
###########################################################################
#summarize strain variation in tubule area
tub.area = filter(phenos, ! is.na(`AverageTubuleArea (mm2)`)) %>%
  group_by(Strain) %>% 
  summarize(avg = mean(`AverageTubuleArea (mm2)`), sd = sd(`AverageTubuleArea (mm2)`), count = n(), sex_ratio = mean(sex_ratio))

#define colors
pt.colors = rep("gray75", times = length(tub.area$Strain))
pt.colors[which(tub.area$Strain %in% founder.strains)]  = "gray75"
pt.colors[which(tub.area$Strain == "129S1/SvImJ")]  = colors[2]
pt.colors[which(tub.area$Strain == "CC032/GeniUnc")]  = colors[1]

sorted.tub.area = arrange(tub.area, avg)
sorted.tub.area <- mutate(sorted.tub.area, StrainF = factor(Strain, Strain))

pdf(file = "Figure7a.pdf", height = 5, width = 5)
p <- ggplot(data = sorted.tub.area, aes(x = StrainF, y = avg)) + 
  geom_errorbar(aes(x = StrainF, ymin = avg-sd, ymax = avg+sd), width = 0.2, size = 0.5) +
  geom_point(size = 3.5, shape = 21, aes(fill = factor(Strain))) + 
  scale_fill_manual(values=pt.colors) +
  theme_bw(base_size = 16) + 
  theme(legend.position = "none", axis.text.x = element_text(angle=90, vjust = 0.5, hjust = 1), axis.title.x = element_blank()) +
  ylab("Mean Tubule Area (mm^2)") 
p
dev.off()

#compare the number of tubules per cross section between CC032 and the CC founders
tub.n = filter(phenos, ! is.na(`Number tubules per cross section`)) %>%
  group_by(Strain) %>% 
  summarize(avg = mean(`Number tubules per cross section`), sd = sd(`Number tubules per cross section`), count = n())

#define colors
pt.colors = rep("gray75", times = length(tub.n$Strain))
pt.colors[which(tub.n$Strain == "129S1/SvImJ")]  = colors[2]
pt.colors[which(tub.n$Strain == "CC032/GeniUnc")]  = colors[1]

sorted.tub.n = arrange(tub.n, avg)
sorted.tub.n <- mutate(sorted.tub.n, StrainF = factor(Strain, Strain))

p <- ggplot(data = sorted.tub.n, aes(x = StrainF, y = avg)) + 
  geom_errorbar(aes(x = StrainF, ymin = avg-sd, ymax = avg+sd), width = 0.2, size = 0.5) +
  geom_point(size = 3.5, shape = 21, aes(fill = factor(Strain))) + 
  scale_fill_manual(values=pt.colors) +
  theme_bw(base_size = 16) + 
  theme(legend.position = "none", axis.text.x = element_text(angle=90, vjust = 0.5, hjust = 1), axis.title.x = element_blank()) +
  ylab("Mean Number of Tubules") 
p

#compare the % of tubules with vacuoles between CC032 and the CC founders
tub.vac = filter(phenos, ! is.na(`Number tubules with vacuoles`)) %>%
  group_by(Strain) %>% 
  summarize(avg = mean(`Number tubules with vacuoles`/`Number tubules per cross section`, na.rm = T), sd = sd(`Number tubules with vacuoles`/`Number tubules per cross section`, na.rm = T), count = n())

pt.colors = rep("gray75", times = length(tub.vac$Strain))
pt.colors[which(tub.vac$Strain == "129S1/SvImJ")]  = colors[2]
pt.colors[which(tub.vac$Strain == "CC032/GeniUnc")]  = colors[1]

sorted.tub.vac = arrange(tub.vac, avg)
sorted.tub.vac <- mutate(sorted.tub.vac, StrainF = factor(Strain, Strain))
sorted.tub.vac <- mutate(sorted.tub.vac, lowerCI = avg-sd)
sorted.tub.vac$lowerCI[which(sorted.tub.vac$lowerCI < 0)] = 0

pdf(file = "Figure7d.pdf", height = 5, width = 5)
p <- ggplot(data = sorted.tub.vac, aes(x = StrainF, y = avg)) + 
  geom_errorbar(aes(x = StrainF, ymin = lowerCI, ymax = avg+sd), width = 0.2, size = 0.5) +
  geom_point(size = 3.5, shape = 21, aes(fill = factor(Strain))) + 
  scale_fill_manual(values=pt.colors) +
  theme_bw(base_size = 16) + 
  theme(legend.position = "none", axis.text.x = element_text(angle=90, vjust = 0.5, hjust = 1), axis.title.x = element_blank()) +
  ylab("% Tubules with Vacuoles") 
p
dev.off()


#compare the number of tubules with apoptotic cells between CC032 and the CC founders
tub.apop = filter(phenos, ! is.na(`Number tubules with apoptotic cells`)) %>%
  group_by(Strain) %>% 
  summarize(avg = mean(`Number tubules with apoptotic cells`/`Number tubules per cross section`, na.rm = T), sd = sd(`Number tubules with apoptotic cells`/`Number tubules per cross section`, na.rm = T), count = n())

pt.colors = rep("gray75", times = length(tub.apop$Strain))
pt.colors[which(tub.apop$Strain == "129S1/SvImJ")]  = colors[2]
pt.colors[which(tub.apop$Strain == "CC032/GeniUnc")]  = colors[1]

sorted.tub.apop = arrange(tub.apop, avg)
sorted.tub.apop <- mutate(sorted.tub.apop, StrainF = factor(Strain, Strain))
sorted.tub.apop <- mutate(sorted.tub.apop, lowerCI = avg-sd)
sorted.tub.apop$lowerCI[which(sorted.tub.apop$lowerCI < 0)] = 0

#pdf(file = "Figure7_apop.pdf", height = 5, width = 5)
p <- ggplot(data = sorted.tub.apop, aes(x = StrainF, y = avg)) + 
  geom_errorbar(aes(x = StrainF, ymin = lowerCI, ymax = avg+sd), width = 0.2, size = 0.5) +
  geom_point(size = 3.5, shape = 21, aes(fill = factor(Strain))) + 
  scale_fill_manual(values=pt.colors) +
  theme_bw(base_size = 16) + 
  theme(legend.position = "none", axis.text.x = element_text(angle=90, vjust = 0.5, hjust = 1), axis.title.x = element_blank()) +
  ylab("% Apoptotic Tubules") 
p
#dev.off()

###########################################################################
#compare the number of X versus Y-bearing sperm in CC032 FISH exp'ts
###########################################################################
xyfish = fread(file = "TableS6_SpermFISHCounts.csv")

unique(xyfish$Sample)
xyfish = filter(xyfish, Sample == "CC032_2017_0915")

nY = dim(filter(xyfish, SexChr=="Y"))[1]  #723
nX = dim(filter(xyfish, SexChr=="X"))[1]  #715

#binomial test
binom.test(nX, nX+nY)
# Exact binomial test
# 
# data:  715 and 715 + 723
# number of successes = 715, number of trials = 1438, p-value = 0.8536
# alternative hypothesis: true probability of success is not equal to 0.5
# 95 percent confidence interval:
#   0.4710564 0.5233917
# sample estimates:
#   probability of success 
# 0.4972184 

#reconfigure the data for ease of plotting
xyfish.simple = xyfish %>% group_by(SexChr) %>% summarize(count=n())
xyfish.simple = xyfish.simple %>% mutate(fraction = count/sum(count))

#compute binomial error and add to the tibble: 
Xerr = as.numeric((binom.test(nX, nX+nY))$conf.int)
Yerr = as.numeric((binom.test(nY, nX+nY))$conf.int)
xyfish.simple = xyfish.simple %>% bind_cols(lowerCI=c(Xerr[1], Yerr[1]), upperCI=c(Xerr[2],Yerr[2]))

#plot the proportion of X and Y-bearing sperm with error bars: 
setwd("~/Box/iMac/Documents/Projects/SexRatioBias/Manuscript/SupplementalData/")

pdf(file = "Figure7f.pdf", height = 5, width = 5)
p <- ggplot(data = xyfish.simple, aes(x = as.factor(SexChr), y = fraction, fill = SexChr)) + 
  geom_bar(stat ="identity", color = "black") + 
  theme_bw(base_size = 16) + theme(legend.position = "none") +
  scale_fill_manual(values=rev(colors)) + ylim(0,0.6) + xlab("Sex Chromosome") + ylab("Fraction of Sperm") +
  geom_errorbar(aes(x = as.factor(SexChr), ymin = lowerCI, ymax = upperCI), width = 0.05, size = 1)
p
dev.off()
###########################################################################
###########################################################################
#plot read depth across chrX and Y in CC032
###########################################################################

#specify paths to read depth files
founder_path = "/Volumes/BigData/sanger_genomes/read_depth/mosdepth"
cc_path = "/Volumes/BigData/cc_genomes/read_depth/bedgraph"

haplo_blocks = "~/Box/iMac/Documents/Projects/CC_files/haplotype_blocks/reformatted"
colors = c("lightcoral", "gold2", "darkgreen","navy", "deepskyblue","red", "purple3", "gray75") #cc color scheme

window_start = 30500000
window_stop = 35500000
len = (window_stop-window_start)/1000000
ymax = 16

setwd("~/Box/iMac/Documents/Projects/SexRatioBias/Manuscript/SupplementalData/")
pdf(file = "Figure8.pdf", height = 6, width = 8)
par(mar=c(4, 6, 1, 0.5))
plot(x = c(0,len), y = c(0, ymax), type = "n", axes = F, xlab = "Position (Mb)", ylab = "")

setwd(founder_path)
founder_files = list.files(path = founder_path, pattern = "*.XY.gcCorrectedRD.bedgraph")
plotMax = 10 
iter = 1

for (file in founder_files) {
  data = fread(file = file, skip = 1)
  data <- data %>% filter(V1=="X", V2 > window_start, V3 < window_stop)
  data <- data %>% mutate(midpoint=(V2+V3)/2000000-window_start/1000000)
  data$V4[which(data$V4 > plotMax)] = plotMax
  data <- data %>% mutate(yval_scaled = V4/(plotMax))
  
  for (r in 1:dim(data)[1]) {
    lines(x = rep(data$midpoint[r], 2), y = c(ymax-iter, ymax-iter+data$yval_scaled[r]), lwd = 0.2, col = colors[iter])
  }
  abline(h = ymax-iter+0.1, lwd = 0.5, col = "black", lty = 3)
  abline(h = ymax-iter, lwd = 0.75, col = "black", lty = 1)
  
  strain = (strsplit(x = file, split = ".regions"))[[1]][1]
  strain = sub("_", "/", strain)
  text(x = -0.3, y = ymax-iter, adj = 1, labels = strain, xpd = T)
  iter=iter+1
}

setwd(cc_path)
cc_files = list.files(path = cc_path, pattern = "*.XY.gcCorrectedRD.bedgraph")

#for (strain in c("CC033", "CC032", "CC005", "CC010", "CC007", "CC043", "CC040", "CC050", "CC072", "CC081")) {
#for (strain in c("CC033", "CC032", "CC005", "CC043", "CC040", "CC050", "CC072", )) {
strainColors = c(colors[8], colors[8], colors[8], colors[8], colors[1], colors[4], colors[6])
strain_iter =0
for (strain in c("CC033", "CC032", "CC005", "CC043", "CC036", "CC078", "CC058")) {
  file = cc_files[grep(strain, cc_files)]
  data = fread(file = file, skip = 1)
  data <- data %>% filter(V1=="X", V2 > window_start, V3 < window_stop)
  data <- data %>% mutate(midpoint=(V2+V3)/2000000-window_start/1000000)
  data$V4[which(data$V4 > plotMax)] = plotMax
  data <- data %>% mutate(yval_scaled = V4/(plotMax))
  strain_iter=strain_iter+1
  
  for (r in 1:dim(data)[1]) {
    lines(x = rep(data$midpoint[r], 2), y = c(ymax-iter, ymax-iter+data$yval_scaled[r]), lwd = 0.2, col = strainColors[strain_iter])
  }
  abline(h = ymax-iter+0.1, lwd = 0.5, col = "black", lty = 3)
  abline(h = ymax-iter, lwd = 0.75, col = "black", lty = 1)
  
  text(x = -0.3, y = ymax-iter, adj = 1, labels = strain, xpd = T)
  iter=iter+1
}

#add gene track
refSeq = "/Volumes/BigData/reference_genomes/mm10/mm10_refSeq.bed"
refSeq=fread(file = refSeq)
refSeq <- refSeq %>% filter(V1 == "chrX", V2 > window_start, V3 < window_stop)
refSeq = unique(refSeq, by = 1:3)

#round gene coordinates and eliminate near duplicates to thin the plot: 
refSeq$V2 = signif(refSeq$V2, digits = 6)
refSeq$V3 = signif(refSeq$V3, digits = 6)
refSeq = unique(refSeq, by = 1:3)

#add genes to plot: 
drop = 0
for (r in 1:dim(refSeq)[1]) {
  rect(xleft = (refSeq$V2[r]-window_start)/1000000, ybottom = ymax-iter-drop, ytop = ymax-iter-drop+0.3, xright = (refSeq$V3[r]-window_start)/1000000, col = "gray75", border = "black")
  text(x = (refSeq$V2[r]-window_start)/1000000, y = ymax-iter-drop+0.15, adj = 1.05, labels = refSeq$V4[r], xpd = T, cex = 0.6, )
  drop = drop+0.3
  if (drop > 0.9) {drop = 0}
}
text(x = -0.3, y = ymax-iter, adj = 1, labels = "RefSeq", xpd = T)

#add position axis
axis(side = 1, at = c(-1,seq(0,5,0.5),10), labels = c("", seq(30.5,35.5,0.5), ""), lwd = 1, col = "black")

dev.off()
